# Supplementary material
Source: PubMed Central journal article supplement (PMC4472368)
Supplement: NIHMS696478-supplement-Appendices.pdf [file NIHMS696478-supplement-Appendices.pdf]

**Appendices (all available online only)**

**Appendix 1.**

The 15% cut-off to include predominantly non-syndromic, unexplained hearing loss was set at this value according to the following reasoning: In a worst case scenario (i.e. maximum skew from inclusion of syndromic patients), a syndromic population might have a 100% anomaly risk. In that scenario, "dilution" of the nonsyndromic population will increase the proportion estimated by  $\leq 0.1$  if syndromic proportion is <15% of the study population (See Table below). The 0.3 value was selected from preliminary data suggesting a potential 30% diagnostic yield, at the outset of the reported analysis.

| Proportion of SNHL w anomaly (estimate) |           | Proportion of study population |           | Estimated reported proportion |
|-----------------------------------------|-----------|--------------------------------|-----------|-------------------------------|
| Nonsyndromic                            | Syndromic | Nonsyndromic                   | Syndromic | Nonsyndromic+syndromic        |
| 0.3                                     | 1         | 1                              | 0         | 0.3                           |
| 0.3                                     | 1         | 0.95                           | 0.05      | 0.335                         |
| 0.3                                     | 1         | 0.9                            | 0.1       | 0.37                          |
| 0.3                                     | 1         | 0.85                           | 0.15      | 0.405                         |
| 0.3                                     | 1         | 0.8                            | 0.2       | 0.44                          |
| 0.3                                     | 1         | 0.75                           | 0.25      | 0.475                         |
| 0.3                                     | 1         | 0.7                            | 0.3       | 0.51                          |
| 0.3                                     | 1         | 0.65                           | 0.35      | 0.545                         |
| 0.3                                     | 1         | 0.6                            | 0.4       | 0.58                          |
| 0.3                                     | 1         | 0.55                           | 0.45      | 0.615                         |
| 0.3                                     | 1         | 0.5                            | 0.5       | 0.65                          |
| 0.3                                     | 1         | 0.45                           | 0.55      | 0.685                         |
| 0.3                                     | 1         | 0.4                            | 0.6       | 0.72                          |
| 0.3                                     | 1         | 0.35                           | 0.65      | 0.755                         |
| 0.3                                     | 1         | 0.3                            | 0.7       | 0.79                          |
| 0.3                                     | 1         | 0.25                           | 0.75      | 0.825                         |
| 0.3                                     | 1         | 0.2                            | 0.8       | 0.86                          |
| 0.3                                     | 1         | 0.15                           | 0.85      | 0.895                         |
| 0.3                                     | 1         | 0.1                            | 0.9       | 0.93                          |
| 0.3                                     | 1         | 0.05                           | 0.95      | 0.965                         |
| 0.3                                     | 1         | 0                              | 1         | 1                             |

Appendix 2. Funnel plot to assess for publication bias. Egger's test showed no significant evidence of publication bias ( $p=0.955$ ). The tan line shows the fitted regression line from Egger's test.

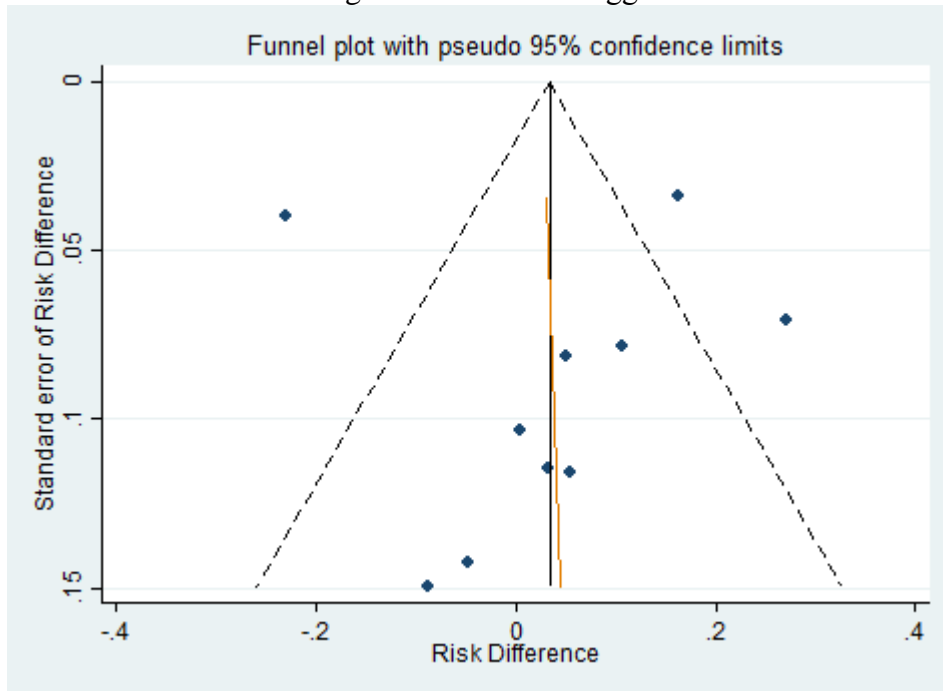

**Appendix 3A. Brain Findings in MRI of Children with Hearing Loss of Unknown Etiology**

| Author, year                 | Study design (Level)                                                                        | Percent (Proportion) with MRI-Identified Diagnoses                 | Age Group                           | Extent of Hearing Loss in the Study Population                                                                                                                                                                                                                                                                                                            | Additional Comments                                                                 |
|------------------------------|---------------------------------------------------------------------------------------------|--------------------------------------------------------------------|-------------------------------------|-----------------------------------------------------------------------------------------------------------------------------------------------------------------------------------------------------------------------------------------------------------------------------------------------------------------------------------------------------------|-------------------------------------------------------------------------------------|
| Lin, 2011 <sup>85</sup>      | Retrospective case series with chart review                                                 | 24% (58/242) of patients had brain anomalies                       | “Children” Specific ages NR         | Severe to profound SNHL                                                                                                                                                                                                                                                                                                                                   | Consecutive                                                                         |
| Jonas, 2012 <sup>30</sup>    | Retrospective case series with chart review of cochlear implant candidates                  | 30% (49/162) of patients had brain anomalies (51 anomalies total). | Mean age at scan 3 years 8 months   | Severe/profound bilateral SNHL                                                                                                                                                                                                                                                                                                                            | Consecutive                                                                         |
| Trimble, 2007 <sup>37</sup>  | Retrospective case series with chart review of CI candidates                                | 37% (34/92) of patients                                            | 7 months-17 years (mean: 4.7 years) | Profound HL                                                                                                                                                                                                                                                                                                                                               | Consecutive                                                                         |
| McClay, 2008 <sup>27</sup>   | Retrospective case series with chart review of children with unilateral or bilateral SNHL   | 20% (33/166) of patients had intracranial anomalies                | 1 mo – 17 years (mean 5.3 years)    | Bilateral SNHL, 59% (101/170)<br>Unilateral SNHL, 41% (69/170)<br>Among ears, types of SNHL:<br>Mild, 11% (29/271)<br>Moderate, 19% (51/271)<br>Severe, 10% (28/271)<br>Profound, 41% (110/271)<br>Progressive, 3% (8/271)<br>Sloping, 1% (4/271)<br>Sudden, 1% (3/271)<br>Fluctuating, 1% (4/271)<br>High-frequency, 1% (4/271)<br>Unknown, 11% (30/271) | Consecutive                                                                         |
| Hong, 2010 <sup>32</sup>     | Retrospective case series with chart review of cochlear implant recipients                  | 18% (10/57) of patients had incidental brain findings              | 12-194 months (mean 58 months)      | Severe/profound bilateral SNHL                                                                                                                                                                                                                                                                                                                            | Consecutive<br>Follow up time greater than 6 months                                 |
| Parry, 2005 <sup>3</sup>     | Retrospective case series with chart review of cochlear implant candidates                  | 30% (17/56) of patients had brain anomalies                        | NR<br>“pediatric”                   | Severe/profound bilateral SNHL                                                                                                                                                                                                                                                                                                                            | Consecutive                                                                         |
| Lapointe, 2005 <sup>46</sup> | Retrospective case series with chart review of patients evaluated for cochlear implantation | 20% (8/40) of patients showed significant brain abnormalities      | “Children”<br>Ages NR               | Profound bilateral SNHL                                                                                                                                                                                                                                                                                                                                   | Consecutive                                                                         |
| Kimani, 2010 <sup>48</sup>   | Retrospective case series with chart review of children with SNHL                           | 33% (29/87) of patients without CMV had brain anomalies            | 1 – 5 years                         | Profound HL, 46% (43/101)<br>Severe HL, (15/101)<br>Bilateral HL, 85% (87/101)                                                                                                                                                                                                                                                                            | All children referred from newborn screening.<br>Consecutive status of patients NR. |

HL – Hearing loss; SNHL – Sensorineuronal hearing loss; NR – Not reported; CMV – cytomegalovirus.

Tarshish, 2013 identified 1 patient with brain findings suggestive of CMV. In Kimani, the 87 brain scans denominator reflects the 97 patients without the 10 patients with known CMV.

**Appendix 3A. Brain Findings in MRI of Children with Hearing Loss of Unknown Etiology (continued)**

| Author, year                    | Study design (Level)                                                                               | Percent (Proportion) with MRI-Identified Diagnoses                               | Age Group                                | Extent of Hearing Loss in the Study Population                                                                                                                       | Additional Comments                                                                                                                                                   |
|---------------------------------|----------------------------------------------------------------------------------------------------|----------------------------------------------------------------------------------|------------------------------------------|----------------------------------------------------------------------------------------------------------------------------------------------------------------------|-----------------------------------------------------------------------------------------------------------------------------------------------------------------------|
| Haffey, 2013 <sup>42</sup>      | Retrospective case series of patients with unilateral SNHL                                         | 13% (4/31) of patients had brain anomalies                                       | 0-17 years old (mean: 5.6 years)         | Type of hearing loss:<br>Low frequency, 1% (1/79)<br>Mid-frequency, 22% (17/79)<br>High frequency, 37% (29/79)<br>Flat, 41% (32/79)                                  | Consecutive<br>Follow up time of 5 years.                                                                                                                             |
| Mafong, 2002 <sup>38</sup>      | Retrospective case series with chart review of children with SNHL                                  | 19% (4/21) of patients had brain anomalies                                       | 1-18 years (mean 9 years)                | Bilateral SNHL, 83% (95/114)<br>Unilateral SNHL, 11% (13/114).<br>Moderate to profound hearing loss, 81% (92/114)<br>Mild hearing loss, 19% (22/114)                 | Consecutive                                                                                                                                                           |
| Simons, 2006 <sup>8</sup>       | Retrospective case series with chart review of children with unilateral or bilateral asymmetric HL | 10% (5/50) of patients had brain anomalies                                       | 0-17 years                               | Unilateral SNHL, 80% (40/50)<br>Asymmetric SNHL, 20% (10/50)                                                                                                         | Consecutive                                                                                                                                                           |
| Russo, 2006 <sup>45</sup>       | Retrospective case series with chart review of children with profound SNHL                         | 0% (0/17) of patients had brain anomalies                                        | Median age 3 (range <1-14 years old)     | Profound hearing loss                                                                                                                                                | Consecutive.<br>Subgroup analysis of profound SNHL of unknown etiology. (CMV, meningitis, rubella, syphilis excluded).<br>Sagittal high-resolution temporal bone MRI. |
| Brookhouser, 1991 <sup>49</sup> | Retrospective case series with chart review of patients with unilateral SNHL                       | 0% (0/7) of patients had brain anomalies                                         | 0-19.8 years (mean 8.8 years)            | Borderline 19% (12/64)<br>Mild 31% (20/64)<br>Moderate 25% (16/64)<br>Severe 42% (27/64)<br>Profound 19% (12/64)<br>Anacusic 26% (17/64)<br>High-frequency 3% (2/64) | Consecutive<br>Follow-up data available for periods of 1-15 years. Brain findings described as “no space occupying lesions”.                                          |
| Ohlms, 1999 <sup>39</sup>       | Retrospective case series with chart review of children with SNHL or mixed HL                      | 0% (0/6) of patients had a brain anomaly that seemed related to the hearing loss | 0 - 10 years at diagnosis (mean 2 years) | For the entire study, 81% (92/114) had severe or profound HL (includes sample without imaging data)                                                                  | Consecutive status of patients NR                                                                                                                                     |

**Appendix 3B. Counts and Types of Brain Anomalies in Children in Studies of MRI of Children with Hearing Loss**

| Author, year                                    | Jonas, 2012 <sup>50</sup> | Hong, 2010 <sup>52</sup> | Parry, 2005 <sup>5</sup> | Lapointe, 2005 <sup>46</sup> | Kimani, 2010 <sup>48</sup> | Simons, 2006 <sup>8</sup> | Haffey, 2013 <sup>42</sup> | Mafong, 2002 <sup>38</sup> | Trimble, 2007 <sup>57</sup> | Lin, 2011 <sup>83</sup> | McClay, 2008 <sup>27</sup> |
|-------------------------------------------------|---------------------------|--------------------------|--------------------------|------------------------------|----------------------------|---------------------------|----------------------------|----------------------------|-----------------------------|-------------------------|----------------------------|
| <b>Malignant/Neoplastic Masses</b>              | 10% (5/51)                | --                       | --                       | --                           | --                         | --                        | --                         | --                         | --                          | --                      | 9% (3/33)                  |
| <b>Non-malignant/ Non-neoplastic Masses</b>     | 4% (2/51)                 | --                       | --                       | --                           | --                         | 13% (2/15)                | 10% (1/10)                 | 14% (1/7)                  | 9% (3/34)                   | --                      | --                         |
| <b>Vascular Lesions</b>                         | 4% (2/51)                 | --                       | --                       | --                           | --                         | --                        | 10% (1/10)                 | --                         | --                          | --                      | --                         |
| <b>Anatomic/Structural Findings</b>             | 12% (6/51)                | --                       | 18% (3/17)               | 38% (3/8)                    | 21% (6/29)                 | 20% (3/15)                | 10% (1/10)                 | 43% (3/7)                  | 3% (1/34)                   | 43% (5/58)              | 42% (14/33)                |
| <b>White Matter Findings</b>                    | 70% (36/51)               | 100% (10/10)             | 41% (8/17)               | 38% (3/8)                    | 45% (13/29)                | --                        | 10% (1/10)                 | --                         | 15% (5/34)                  | 33% (19/58)             | --                         |
| <b>Grey Matter Findings</b>                     | 4% (2/51)                 | 10% (1/10)               | --                       | --                           | --                         | --                        | --                         | --                         | --                          | --                      | --                         |
| <b>Cerebellar Findings</b>                      | 4% (2/51)                 | --                       | 6% (1/17)                | --                           | --                         | --                        | --                         | --                         | 3% (1/34)                   | --                      | --                         |
| <b>Ventricle/Cerebrospinal Fluid Finding</b>    |                           |                          | 6% (1/17)                | --                           | 35% (10/29)                | --                        | --                         | --                         | 24% (8/34)                  | --                      | --                         |
| <b>Heterotopia/ Dysplasia/ Encephalomalacia</b> | 4% (2/51)                 | --                       | --                       | 38% (3/8)                    | --                         | --                        | --                         | --                         | 3% (1/34)                   | 31% (18/58)             | --                         |
| <b>Metabolic/Reactive/ Infectious Findings</b>  | 2% (1/51)                 | 20% (2/10)               | 53% (9/17)               | --                           | --                         | --                        | --                         | --                         | 44% (15/34)                 | 28% (16/58)             | 33% (11/33)                |

Tarshish, 2013 identified 1 patient with brain findings suggestive of CMV. Ohlms, 1999; Brookhouser, 1991; and Russo, 2006 identified no patients with brain findings.

The denominators shown are the number of patients with non-normal MRI findings, except in Jonas, which reflect the total number of anomalies (not the total number of patients with anomalies).

Malignant /Neoplastics Masses includes: neoplasms, malignancies, unspecified “tumor.” Non-malignant/Non-neoplastic Masses includes: cysts, lipoma, glioma.

Vascular Lesions includes: vasculitis, cavernoma, hematoma. Anatomic/Structural includes: holoprosencephaly, abnormal brainstem/brainstem hypoplasia, microcephaly, corpus callosum hypoplasia/dysgenesis, bilateral hemispheric volume loss, immature brain appearance, Dandy Walker malformation, Chiari I/II, prominent temporal horns, pachygyria, cortex dysplasia. White matter findings includes: generalized changes/signal changes, myelination problems, periventricular leukomalacia. Grey Matter findings includes: general gray matter changes. Cerebellar Findings includes: hypoplasia, dysplasia.

Ventricle/Cerebrospinal Fluid includes: shunt, ventriculomegaly, extra-axial cerebrospinal fluid (CSF). Heterotopia/Cortical Dysplasia/ Encephalomalacia includes: periventricular nodular heterotopia, ectopia, dysplasia, cortical dysplasia, encephalomalacia. Metabolic/Reactive/Infectious Findings includes: neurometabolic processes, gliosis, cytomegalovirus.

**Appendix 4A. MRI Findings in Children with Auditory Spectrum Neuropathy**

| <b>Author, year</b>        | <b>Study design (Level)</b>                 | <b>Percent (Proportion) with MRI-Identified Diagnoses</b>                                                                 | <b>Age Group</b>                           | <b>Extent of Hearing Loss in the Study Population</b>                                                      | <b>Additional Comments</b>                 |
|----------------------------|---------------------------------------------|---------------------------------------------------------------------------------------------------------------------------|--------------------------------------------|------------------------------------------------------------------------------------------------------------|--------------------------------------------|
| Huang, 2010 <sup>53</sup>  | Retrospective case series with chart review | 34% (35/103) of patients (otological)<br>36% (37/103) of patients (brain)                                                 | 11 weeks – 13.5 years (mean of 2.31 years) | Bilateral ANSD, 77% (79/103)<br>Unilateral ANSD, 23% (24/103)                                              | Consecutive                                |
| Roche, 2010 <sup>54</sup>  | Retrospective case series with chart review | 64% (68/107) of patients (“at least one imaging abnormality)<br><br>40% (42/106) of patients (intracranial abnormalities) | Mean age at MRI: 2.34±2.37 years           | Of entire study population:<br>Bilateral ANSD, 76% (90/118)<br>Unilateral ANSD, 24% (28/118)               | Consecutive                                |
| Teagle, 2010 <sup>55</sup> | Prospective case series with chart review   | 38% (18/48) of patients (otological and brain combined)                                                                   | 14-241 months (mean of 88 months)          | Of entire study population:<br>Bilateral ANSD, 88% (50/58)<br>Unilateral ANSD and bilateral HL, 12% (8/58) | Consecutive                                |
| Laury, 2009 <sup>56</sup>  | Retrospective case series with chart review | 100% (10/10) of patients (otological and brain)                                                                           | 0-9 years old (mean 3.4 years)             | Profound SNHL, 80% (8/10)<br>Moderate to severe SNHL, 20% (2/10)                                           | Consecutive<br>Follow up time of 1-7 years |

**Appendix 4B. Counts and Types of Anomalies in Brain MRI of Children with Hearing Loss due to Auditory Neuropathy**

| Author, year                                             | Huang, 2010 <sup>53</sup>                                                            | Teagle, 2010 <sup>55</sup>               | Laury, 2009 <sup>56</sup>         | Roche, 2010 <sup>54</sup>                                                                                                      |
|----------------------------------------------------------|--------------------------------------------------------------------------------------|------------------------------------------|-----------------------------------|--------------------------------------------------------------------------------------------------------------------------------|
| <b>OTOLOGICAL</b>                                        | --                                                                                   | --                                       | --                                | --                                                                                                                             |
| Cochlear malformation                                    | 31% (11/35)                                                                          | 17% (3/18)                               | --                                | 16% (11/68)                                                                                                                    |
| Vestibular malformation                                  | 20% (7/35)                                                                           | --                                       | --                                | 10% (7/68)                                                                                                                     |
| Large endolymphatic duct/sac                             | 3% (1/35)                                                                            | --                                       | --                                | --                                                                                                                             |
| Cochlear nerve aplasia/absence/<br>dysplasia/ deficiency | 97% (34/35)                                                                          | 50% (9/18)                               | 80% (8/10)                        | 53% (36/68)*                                                                                                                   |
| IAC stenosis/narrowing/atresia                           | 34% (12/35)                                                                          | --                                       | 20% (2/10)<br>“Mildly narrow IAC” | 27% (49/183 ears)                                                                                                              |
| SCC malformation                                         | 17% (6/35)                                                                           | --                                       | --                                | 9% (6/68)                                                                                                                      |
| Bony cochlear nerve canal<br>stenosis/atresia            | 80% (28/35)                                                                          | --                                       | --                                | --                                                                                                                             |
| <b>NEUROLOGICAL</b>                                      | --                                                                                   | --                                       | --                                | --                                                                                                                             |
| Malignant/Neoplastic Masses                              | --                                                                                   | --                                       | 20% (2/10)                        | --                                                                                                                             |
| Non-malignant/ Non-neoplastic<br>Masses                  | --                                                                                   | --                                       | --                                | 5% (2/42)                                                                                                                      |
| Dandy-Walker Malformation                                | --                                                                                   | 11% (2/18)                               | --                                | 10% (4/42)                                                                                                                     |
| Chiari Type I/II malformation                            | --                                                                                   | 6% (1/18)                                | --                                | 5% (2/42)                                                                                                                      |
| Other Anatomic/Structural Findings                       | Mid-/hindbrain<br>malformation, 35% (13/37)<br>Forebrain malformation,<br>19% (7/37) | Optoinfundibular dysplasia, 6%<br>(1/18) | --                                | Microcephaly, 2% (1/42)<br>Brainstem/cerebellum abnormality,<br>38% (16/42)**<br>Cerebrum /midbrain abnormality, 17%<br>(7/42) |
| White Matter Findings                                    | 49% (18/37)                                                                          | 39% (7/18)                               | --                                | 38% (16/42)                                                                                                                    |
| CNS myelination abnormality                              | --                                                                                   | --                                       | --                                | 7% (3/42)                                                                                                                      |
| Ventricle/Cerebrospinal Fluid<br>Finding                 | 51% (19/37)                                                                          | --                                       | --                                | Prominent temporal horns, 16%<br>(33/212 temporal lobes)<br>CSF and/or ventricle abnormalities,<br>48% (20/42)                 |
| Other Abnormalities                                      | --                                                                                   | --                                       | --                                | 17% (7/42)***                                                                                                                  |

White matter findings: generalized changes, myelination problems, periventricular leukomalacia

Non-malignant/ Non-neoplastic Masses: cerebellopontine angle arachnoid cyst, posterior fossa arachnoid cyst

\*“Definite or possible cochlear nerve deficiency”

\*\*Includes Dandy Walker and Chiari type I malformations

\*\*\*Other abnormalities include: persistent hyperplastic primary vitreous, globe abnormality (n= 2), leptomeningeal enhancement, prominent perivascular spaces, and small optic nerve (n=2)

**Appendix 4C. Heterogeneity Among Studies of Children with Auditory Neuropathy / Auditory Dyssynchrony, Proportion with Diagnostic Yield**

| <b>Studies Included</b> | <b>Imaging Modality</b> | <b>Imaging Findings Included</b>                                          | <b>Number of Studies in Group/Subgroup</b> | <b>I<sup>2</sup> (95% Confidence/Uncertainty Interval)</b> |
|-------------------------|-------------------------|---------------------------------------------------------------------------|--------------------------------------------|------------------------------------------------------------|
| All Studies             | MRI                     | Both Otological and Brain Findings Quantified in Non-overlapping Patients | n=3                                        | 87% (63-95%)                                               |
| All Studies             | MRI                     | Otological Findings                                                       | n=3                                        | 81% (42-94%)                                               |
| All Studies             | MRI                     | Brain findings                                                            | n=4                                        | 40% (0-79%)                                                |



Appendix 4D. Forest plot of the diagnostic yield of MRI for brain anomalies in children with auditory neuropathy.

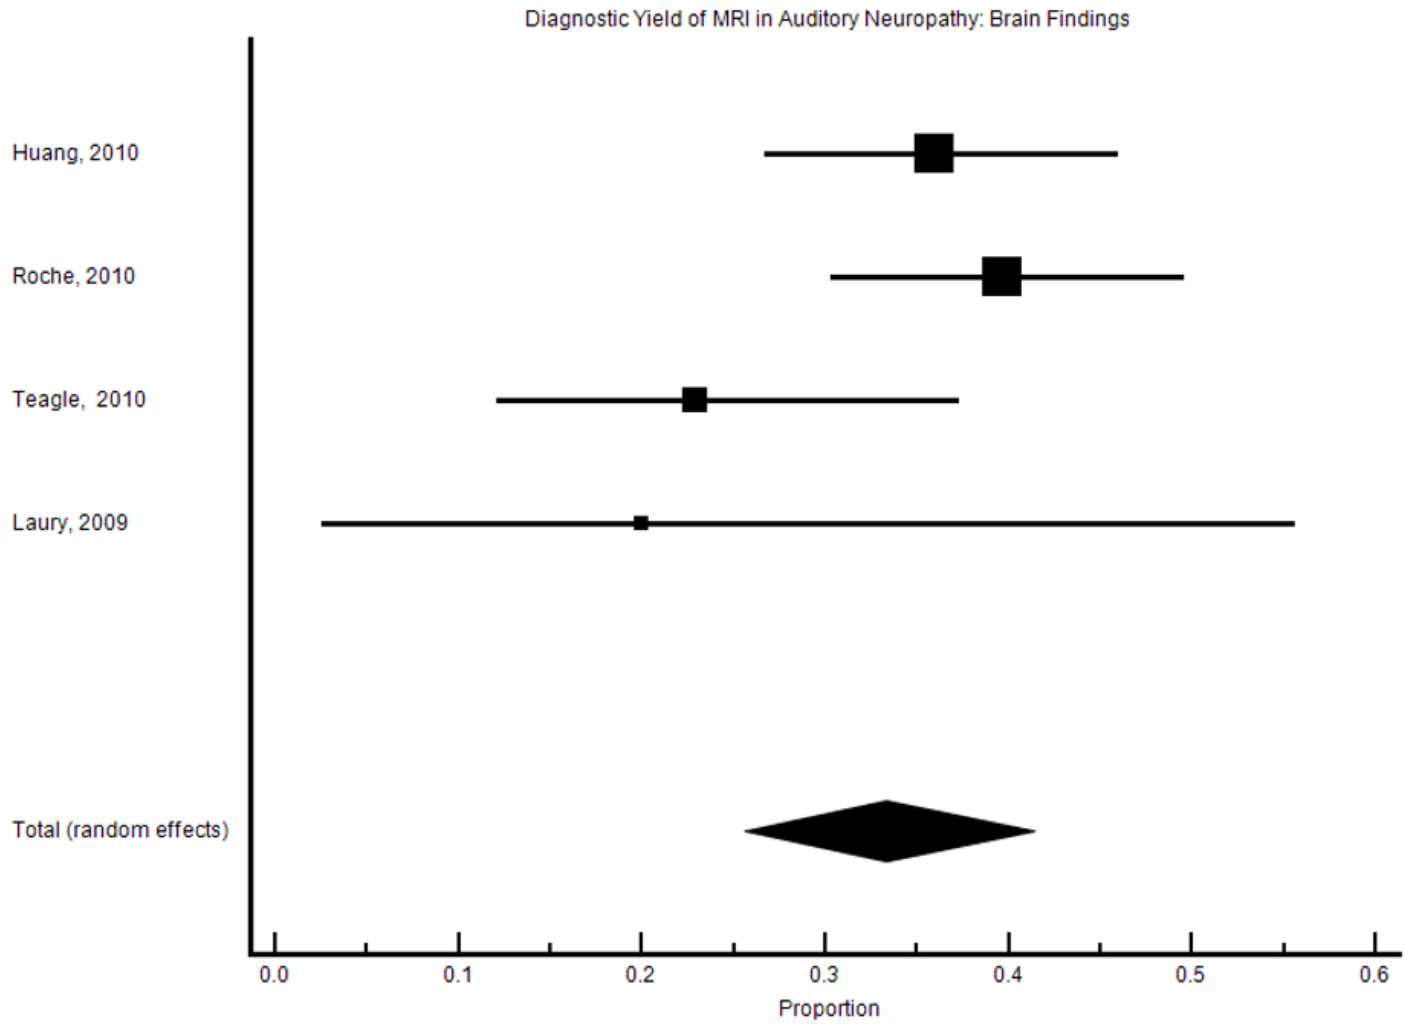

## Appendix 5. Study Characteristics

| Author, year      | Prospective data collection | MRI method/ technique described | Diagnostic criteria described (e.g. size cut-off for EVA) | Masking of MRI assessors to clinical history or results of other imaging | Inter-rater Reliability/ Reproducibility described | Consecutive patients reported |
|-------------------|-----------------------------|---------------------------------|-----------------------------------------------------------|--------------------------------------------------------------------------|----------------------------------------------------|-------------------------------|
| Lin, 2011         | --                          | --                              | x                                                         | --                                                                       | --                                                 | x                             |
| Trimble, 2007     | x                           | x                               | x                                                         | x                                                                        | x                                                  | x                             |
| Kong, 2009        | --                          | x                               | --                                                        | --                                                                       | --                                                 | x                             |
| Declau, 2008      | x                           | --                              | --                                                        | --                                                                       | --                                                 | x                             |
| Komatsubara, 2007 | --                          | x                               | --                                                        | --                                                                       | --                                                 | --                            |
| Parry, 2005       | --                          | x                               | x                                                         | --                                                                       | --                                                 | x                             |
| Miyasaka, 2010    | --                          | x                               | x                                                         | --                                                                       | --                                                 | x                             |
| Simons, 2006      | --                          | x                               | x                                                         | --                                                                       | --                                                 | x                             |
| Preciado, 2004    | --                          | --                              | --                                                        | --                                                                       | --                                                 | x                             |
| Mafong, 2002      | --                          | --                              | --                                                        | --                                                                       | --                                                 | x                             |
| Ohlms, 1999       | --                          | --                              | --                                                        | --                                                                       | --                                                 | --                            |
| Tarshish, 2013    | --                          | --                              | --                                                        | --                                                                       | --                                                 | x                             |
| Ghogomu, 2013     | x                           | --                              | --                                                        | --                                                                       | --                                                 | x                             |
| Haffey, 2013      | --                          | --                              | --                                                        | --                                                                       | --                                                 | x                             |
| Young, 2012       | --                          | x                               | x                                                         | x                                                                        | --                                                 | x                             |
| Fahy, 2001        | --                          | --                              | --                                                        | --                                                                       | --                                                 | x                             |
| Russo, 2006       | --                          | x                               | x                                                         | x                                                                        | --                                                 | x                             |
| Lapointe, 2005    | --                          | x                               | --                                                        | x                                                                        | --                                                 | x                             |
| McClay, 2008      | --                          | x                               | x                                                         | --                                                                       | --                                                 | x                             |
| Clemmens, 2013    | --                          | x                               | x                                                         | x                                                                        | x                                                  | x                             |
| Kimani, 2010      | --                          | x                               | --                                                        | x                                                                        | --                                                 | --                            |
| Brookhouser, 1991 | --                          | --                              | --                                                        | --                                                                       | --                                                 | x                             |
| Whittemore, 2012  | --                          | --                              | --                                                        | --                                                                       | --                                                 | x                             |
| Jonas, 2012       | --                          | x                               | --                                                        | --                                                                       | --                                                 | x                             |
| Hong, 2010        | --                          | x                               | --                                                        | --                                                                       | --                                                 | x                             |
| Huang, 2010       | --                          | x                               | x                                                         | x                                                                        | --                                                 | x                             |
| Roche, 2010       | --                          | x                               | x                                                         | --                                                                       | --                                                 | x                             |
| Teagle, 2010      | x                           | --                              | --                                                        | --                                                                       | --                                                 | x                             |
| Laury, 2009       | --                          | x                               | --                                                        | x                                                                        | --                                                 | x                             |

x: characteristic is present; --: characteristic is absent.
